# Supplementary material for: Varying coordination modes of amide ligand in group 12 Hg(ii) and Cd(ii) complexes: synthesis, crystal structure and nonlinear optical properties
Source: Royal Society of Chemistry journal article supplement (doi:10.1039/c4dt02111h), 2014-11-19
Supplement: c4dt02111h1.pdf [file c4dt02111h1.pdf]

## **Supporting Information**

### **Varying Coordination Modes of Amide Ligand in Group 12 Hg(II) and Cd(II) Complexes: Synthesis, Crystal Structure and Nonlinear Optical Properties**

Shaikh M. Mobin,\* ‡ Veenu Mishra, ‡ Dharendra K. Rai, ‡ Krithika Dota, † Aditya K. Dharmadhikari, † Jayashree A. Dharmadhikari, <sup>Φ</sup> Deepak Mathur, † Pradeep Mathur\*‡

‡ Discipline of Chemistry, School of Basic Sciences, Indian Institute of Technology Indore ,  
Indore 452017, India. E-mail: [xray@iiti.ac.in](mailto:xray@iiti.ac.in)

† Tata Institute of Fundamental Research, 1 Homi Bhabha Road, Mumbai 400005, India

<sup>Φ</sup> Department of Atomic and Molecular Physics, Manipal University, Manipal 576104, India

**Table-S1 Selected bond lengths (Å) and bond angles(°) of 1**

| <b>Bond distance</b> | <b>(Å)</b> |
|----------------------|------------|
| Hg(1)-N(10)          | 2.120(4)   |
| Hg(1)-N(2)           | 2.118(4)   |
| Hg(1)-N(9)           | 2.494(4)   |
| Hg(1)-N(3)           | 2.522(4)   |
| Hg(1)-N(1)           | 2.694(4)   |
| Hg(1)-Hg(2)          | 3.3481(2)  |
| Hg(2)-N(7)           | 2.121(3)   |
| Hg(2)-N(4)           | 2.128(3)   |
| Hg(2)-N(8)           | 2.475(4)   |
| Hg(2)-N(5)           | 2.495(4)   |
| Hg(2)-N(1)           | 2.644(3)   |
| Hg(2)-N(6)           | 2.698(4)   |
| <b>Bond angle</b>    | <b>(°)</b> |
| N(2)-Hg(1)-N(10)     | 168.19(13) |
| N(2)-Hg(1)-N(9)      | 111.43(14) |
| N(10)-Hg(1)-N(9)     | 74.16(13)  |
| N(2)-Hg(1)-N(3)      | 73.14(13)  |
| N(10)-Hg(1)-N(3)     | 112.83(13) |
| N(9)-Hg(1)-N(3)      | 124.90(12) |

|                   |            |
|-------------------|------------|
| N(2)-Hg(1)-N(1)   | 69.77(12)  |
| N(10)-Hg(1)-N(1)  | 102.64(13) |
| N(9)-Hg(1)-N(1)   | 75.88(11)  |
| N(3)-Hg(1)-N(1)   | 142.37(11) |
| N(2)-Hg(1)-Hg(2)  | 81.14(9)   |
| N(10)-Hg(1)-Hg(2) | 87.04(9)   |
| N(9)-Hg(1)-Hg(2)  | 117.31(8)  |
| N(3)-Hg(1)-Hg(2)  | 117.60(9)  |
| N(1)-Hg(1)-Hg(2)  | 50.49(7)   |
| N(7)-Hg(2)-N(4)   | 172.40(14) |
| N(7)-Hg(2)-N(8)   | 73.80(13)  |
| N(4)-Hg(2)-N(8)   | 113.80(13) |
| N(7)-Hg(2)-N(5)   | 102.64(13) |
| N(4)-Hg(2)-N(5)   | 73.66(13)  |
| N(8)-Hg(2)-N(5)   | 121.68(12) |
| N(7)-Hg(2)-N(1)   | 112.88(12) |
| N(4)-Hg(2)-N(1)   | 70.25(12)  |
| N(8)-Hg(2)-N(1)   | 76.42(12)  |
| N(5)-Hg(2)-N(1)   | 143.82(11) |
| N(7)-Hg(2)-N(6)   | 69.79(12)  |
| N(4)-Hg(2)-N(6)   | 102.85(12) |
| N(8)-Hg(2)-N(6)   | 140.84(11) |
| N(5)-Hg(2)-N(6)   | 80.70(12)  |

|                  |            |
|------------------|------------|
| N(1)-Hg(2)-N(6)  | 104.89(11) |
| N(7)-Hg(2)-Hg(1) | 89.69(9)   |
| N(4)-Hg(2)-Hg(1) | 87.15(9)   |
| N(8)-Hg(2)-Hg(1) | 113.71(9)  |
| N(5)-Hg(2)-Hg(1) | 124.55(9)  |
| N(1)-Hg(2)-Hg(1) | 51.83(8)   |
| N(6)-Hg(2)-Hg(1) | 53.19(7)   |

**Table-S2 Selected bond lengths (Å) and bond angles(°) of 2**

| <b>Bond distance</b> | <b>(Å)</b> |
|----------------------|------------|
| Cd(1)-O(4)           | 2.380(4)   |
| Cd(1)-N(5)           | 2.387(4)   |
| Cd(1)-N(10)          | 2.396(4)   |
| Cd(1)-O(2)           | 2.410(4)   |
| Cd(1)-Cl(2)          | 2.5185(12) |
| Cd(1)-Cl(1)          | 2.5271(12) |
| Cd(2)-O(1)           | 2.331(4)   |
| Cd(2)-N(4)           | 2.341(4)   |
| Cd(2)-Cl(3)          | 2.5969(14) |
| <b>Bond angle</b>    | <b>(°)</b> |
| O(4)-Cd(1)-N(5)      | 71.41(14)  |
| O(4)-Cd(1)-N(10)     | 88.81(13)  |
| N(5)-Cd(1)-N(10)     | 155.50(13) |
| O(4)-Cd(1)-O(2)      | 79.72(15)  |
| N(5)-Cd(1)-O(2)      | 90.75(14)  |
| N(10)-Cd(1)-O(2)     | 71.09(14)  |
| O(4)-Cd(1)-Cl(2)     | 94.63(13)  |
| N(5)-Cd(1)-Cl(2)     | 96.54(11)  |
| N(10)-Cd(1)-Cl(2)    | 99.41(10)  |
| O(2)-Cd(1)-Cl(2)     | 168.89(10) |
| O(4)-Cd(1)-Cl(1)     | 164.21(12) |
| N(5)-Cd(1)-Cl(1)     | 96.08(10)  |
| N(10)-Cd(1)-Cl(1)    | 100.46(10) |
| O(2)-Cd(1)-Cl(1)     | 91.14(10)  |
| Cl(2)-Cd(1)-Cl(1)    | 96.39(5)   |
| O(1)#1-Cd(2)-O(1)    | 180.0(2)   |
| O(1)#1-Cd(2)-N(4)    | 85.97(14)  |

|                    |           |
|--------------------|-----------|
| O(1)-Cd(2)-N(4)    | 94.03(14) |
| N(4)-Cd(2)-N(4)#1  | 180.0(1)  |
| O(1)#1-Cd(2)-Cl(3) | 92.96(11) |
| O(1)-Cd(2)-Cl(3)   | 87.04(11) |
| N(4)-Cd(2)-Cl(3)   | 89.76(11) |

**Table-S3: Hydrogen Bonding in 1 and 2 [ $\text{\AA}$  and ( $^\circ$ )].**

|                                                                    | D-H...A                 | d(D-H)   | d(H...A) | d(D...A) | <(DHA)    |
|--------------------------------------------------------------------|-------------------------|----------|----------|----------|-----------|
| <b>1</b>                                                           |                         |          |          |          |           |
| 1                                                                  | C(28)-H(28)...O(4)#(7)  | 0.950(1) | 2.476(1) | 3.251(1) | 138.74(3) |
| 2                                                                  | C(34)-H(34)...O(2)#(8)  | 0.950(1) | 2.541(1) | 3.417(1) | 153.29(4) |
| <b>Equivalent positions</b><br>(7)-x,-y+2,-z+1<br>(8) -x,-y+2,-z+2 |                         |          |          |          |           |
| <b>2</b>                                                           |                         |          |          |          |           |
| 1                                                                  | C(10)-H(10)...Cl(1)#(2) | 0.950(1) | 2.884(1) | 3.797(1) | 161.58(1) |
| 2                                                                  | C(17)-H(17)...Cl(2)#(2) | 0.950(1) | 2.672(1) | 3.570(1) | 157.97(1) |
| <b>Equivalent Position</b><br>(2) x-1/2,+y,-z+1/2                  |                         |          |          |          |           |

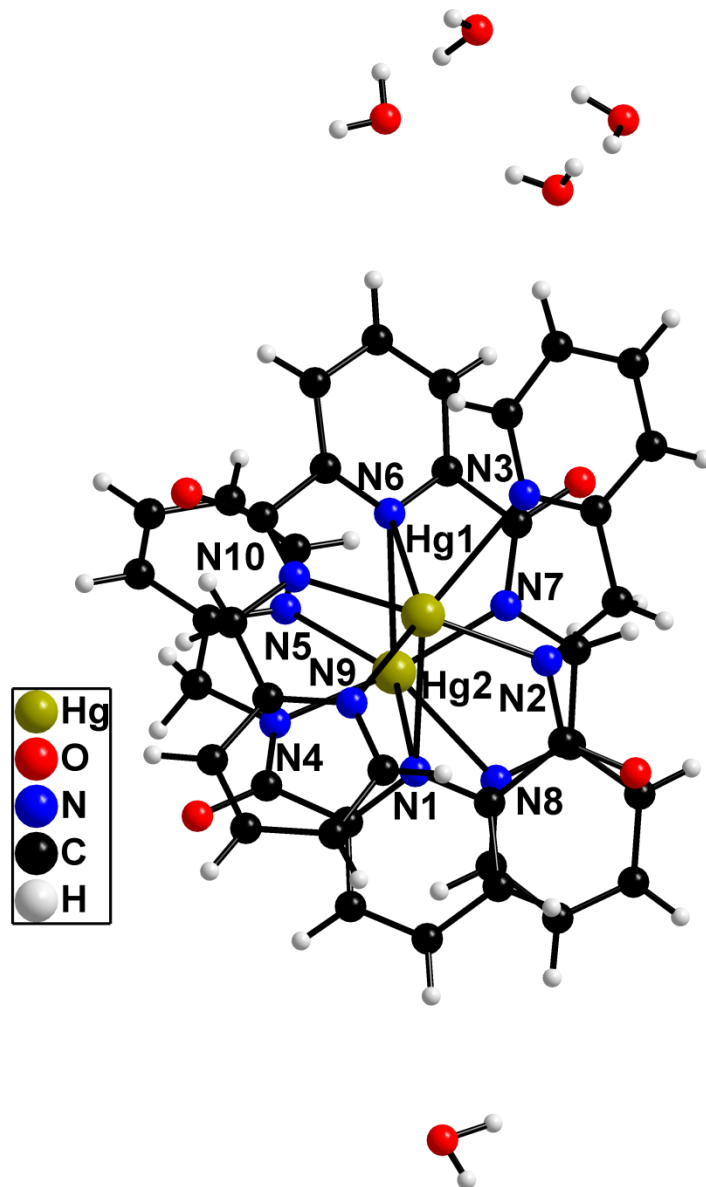

**Fig. S1.** Crystal structure of complex 1 showing five lattice water molecules.



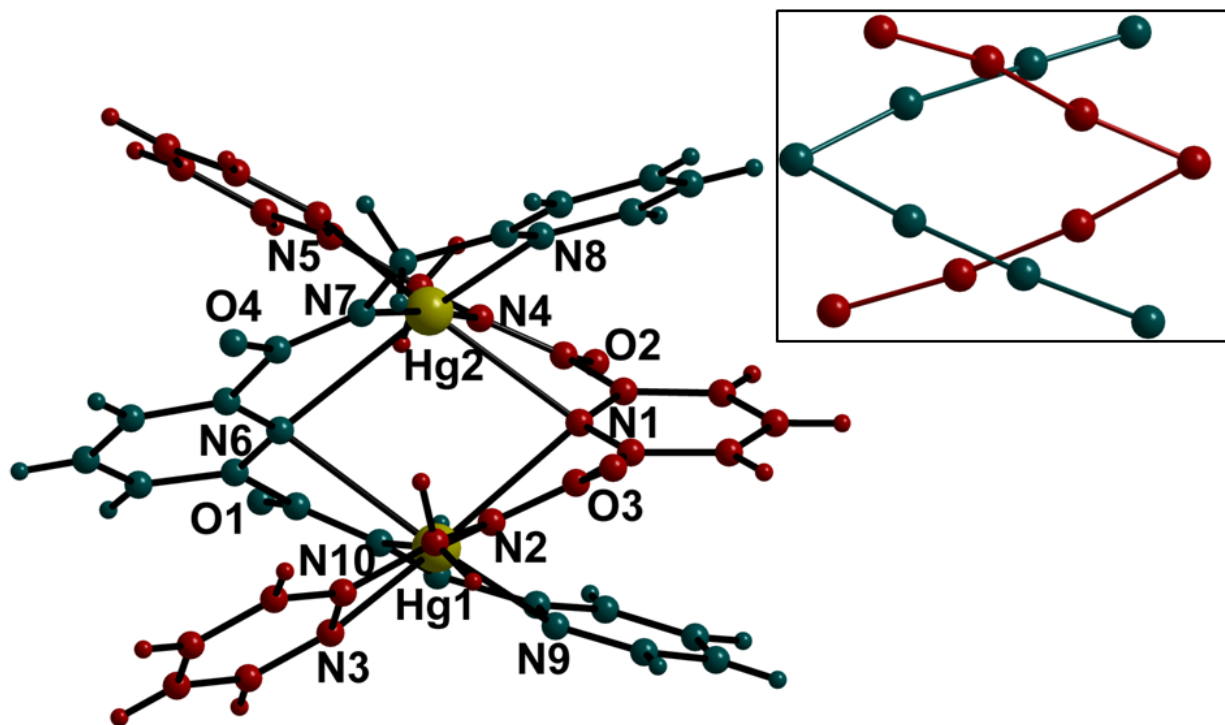

Fig. S2. Doubly helical wrapped crystal structure of 1.

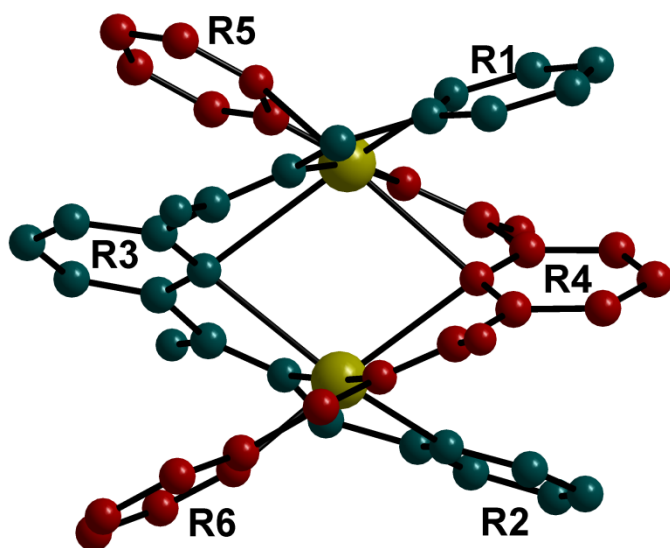

**Fig. S3.** Complex1 showing dihedral angle between terminal and central pyridine rings.

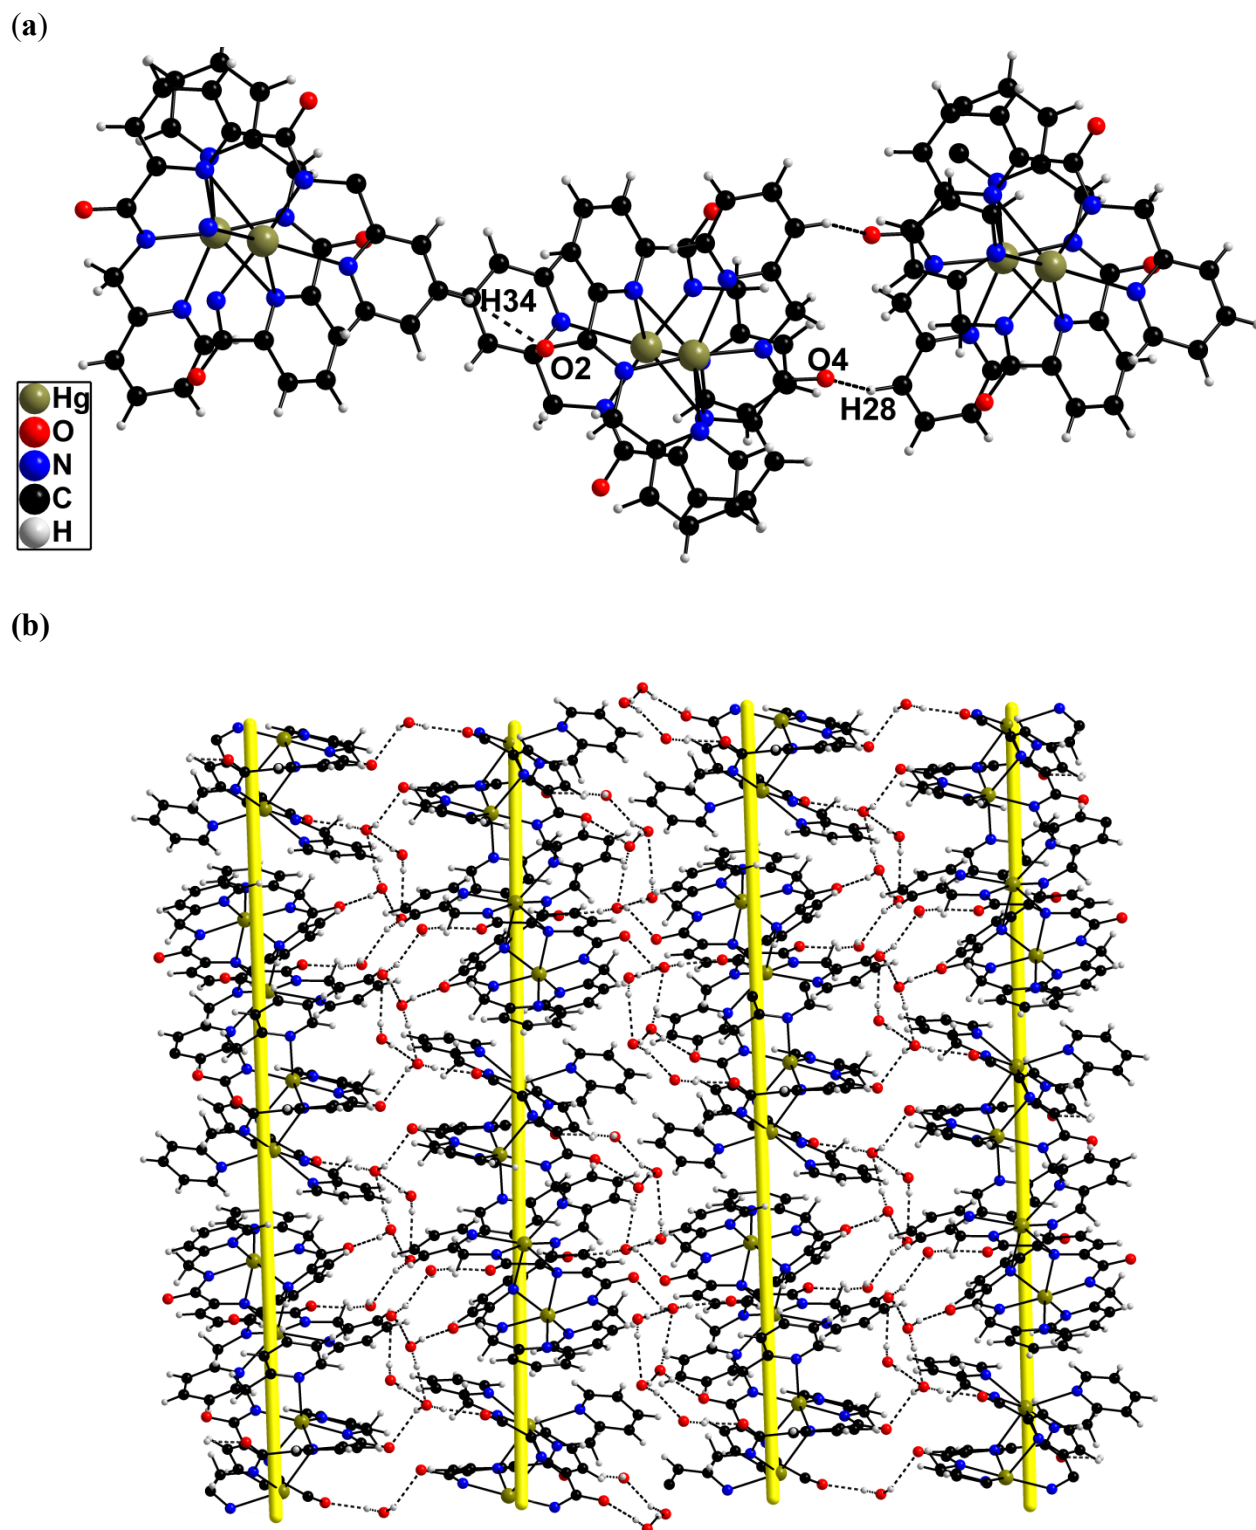

**Fig. S4.** (a) Showing hydrogen bonded 1D chain of complex **1** (b) Packing of complex **1** represents water tetramer between two helical layers.

(a)

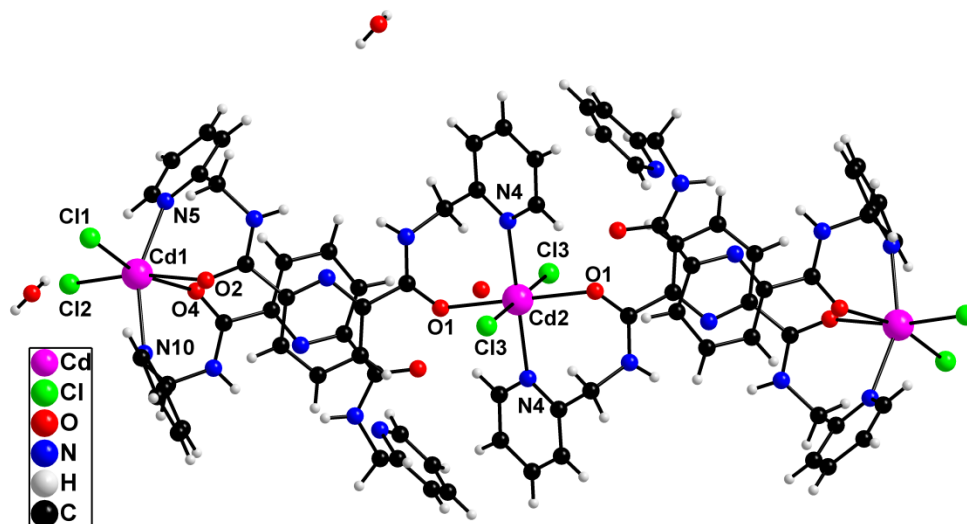

(b)

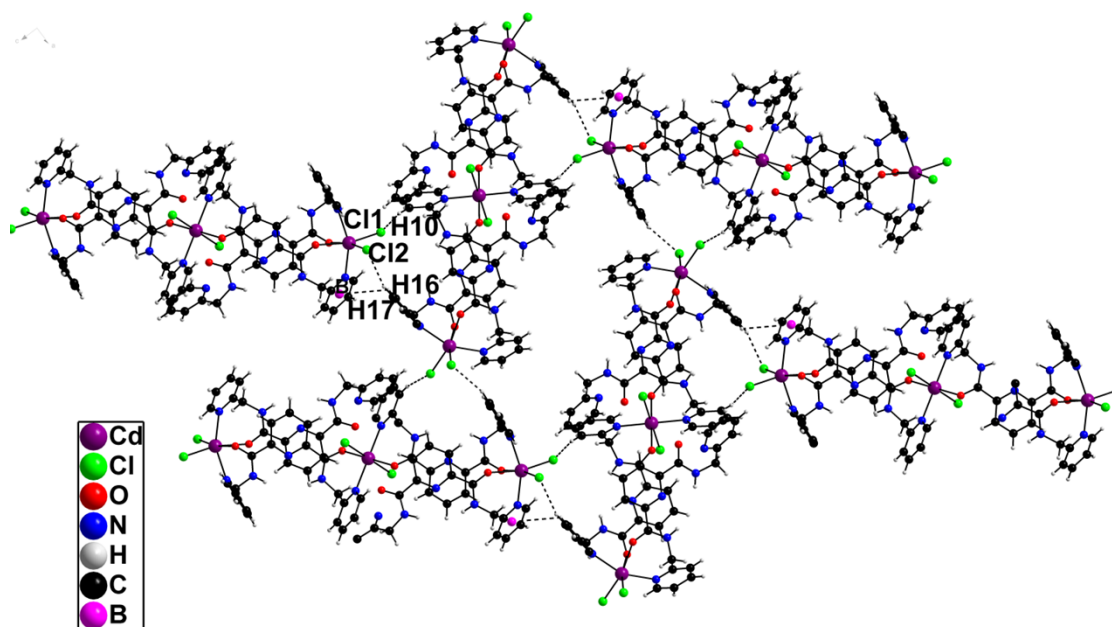

**Fig. S5.** (a) Crystal structure of complex 2. (b) Packing diagram of the H-bonded 2D layer in 2 along *b* axis.

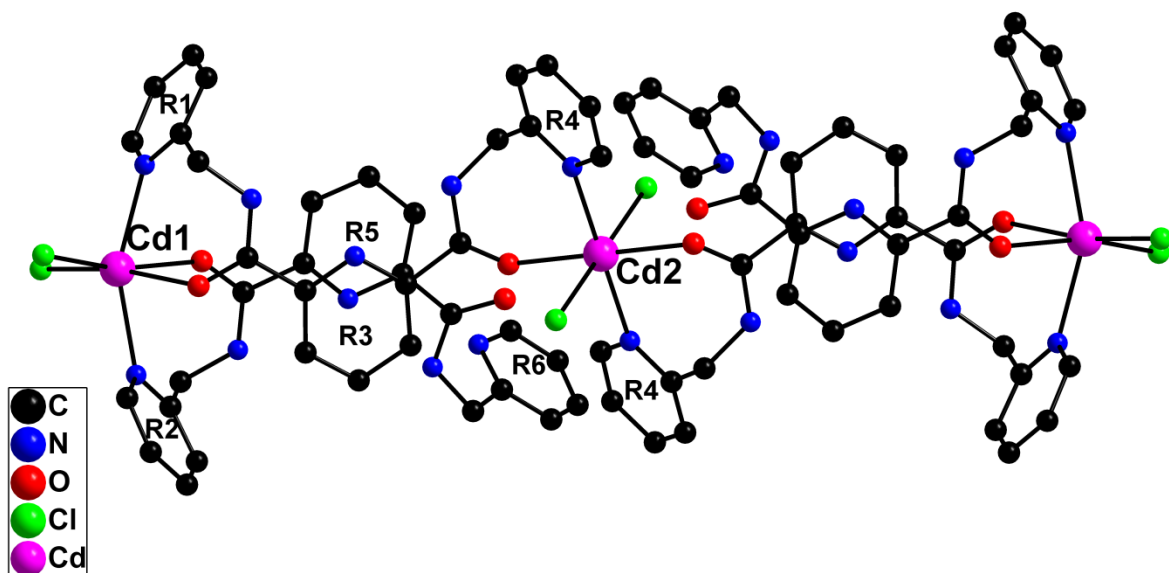

**Fig. S6.** Crystal structure of **2** shows dihedral angle between terminal and central pyridine rings.

Dihedral angle between rings R1, R2 and R4, R4 are  $78.84^\circ$  and  $0^\circ$ . Other dihedral angles

between rings R1, R3 and R5, R6 are found to be  $84.14^\circ$  and  $65.48^\circ$ .

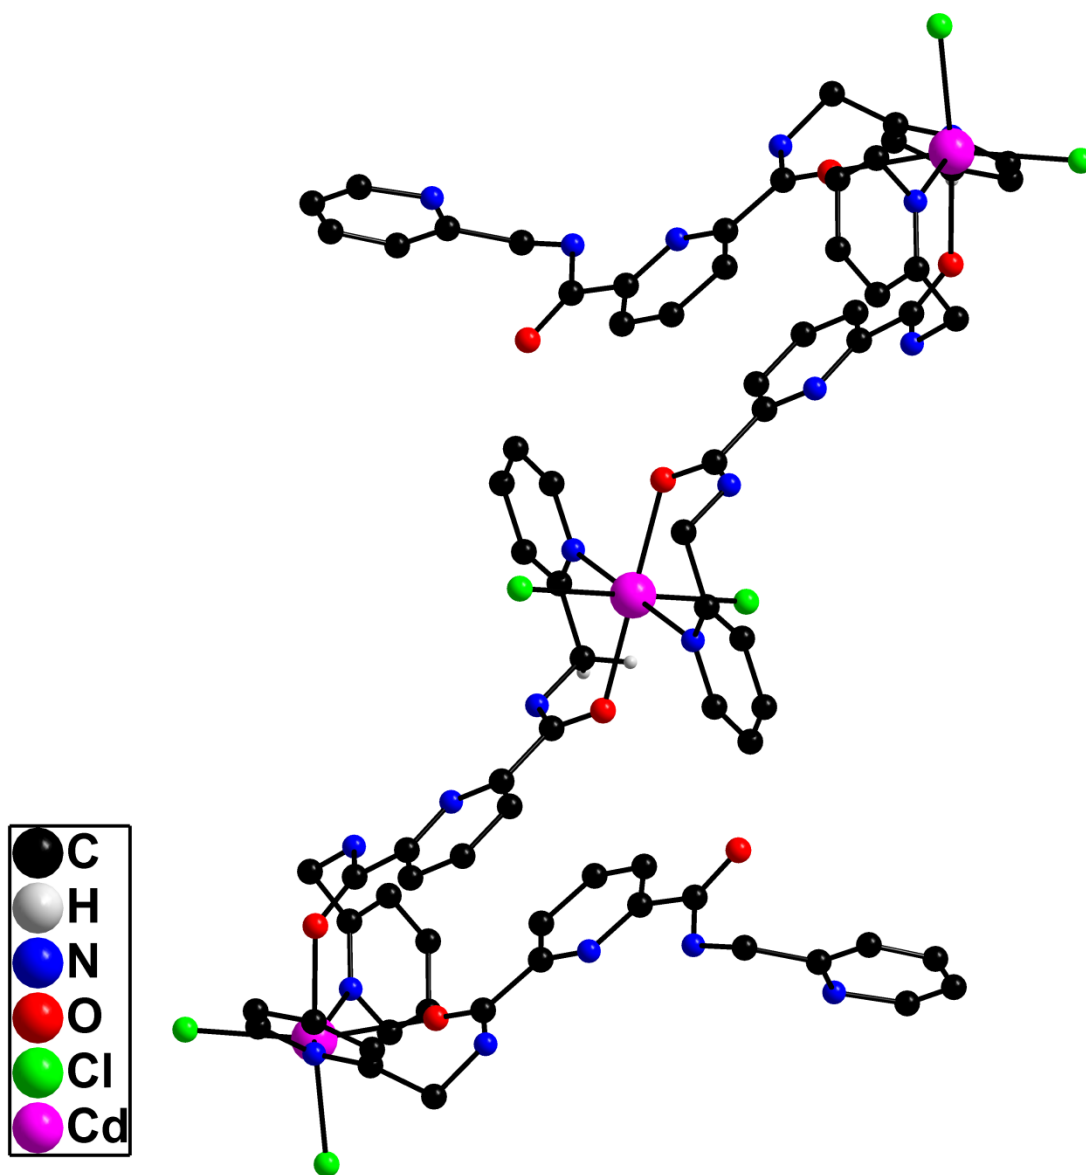

Fig. S7. Z shaped structure of 2 (Hydrogen atoms removed for clarity).

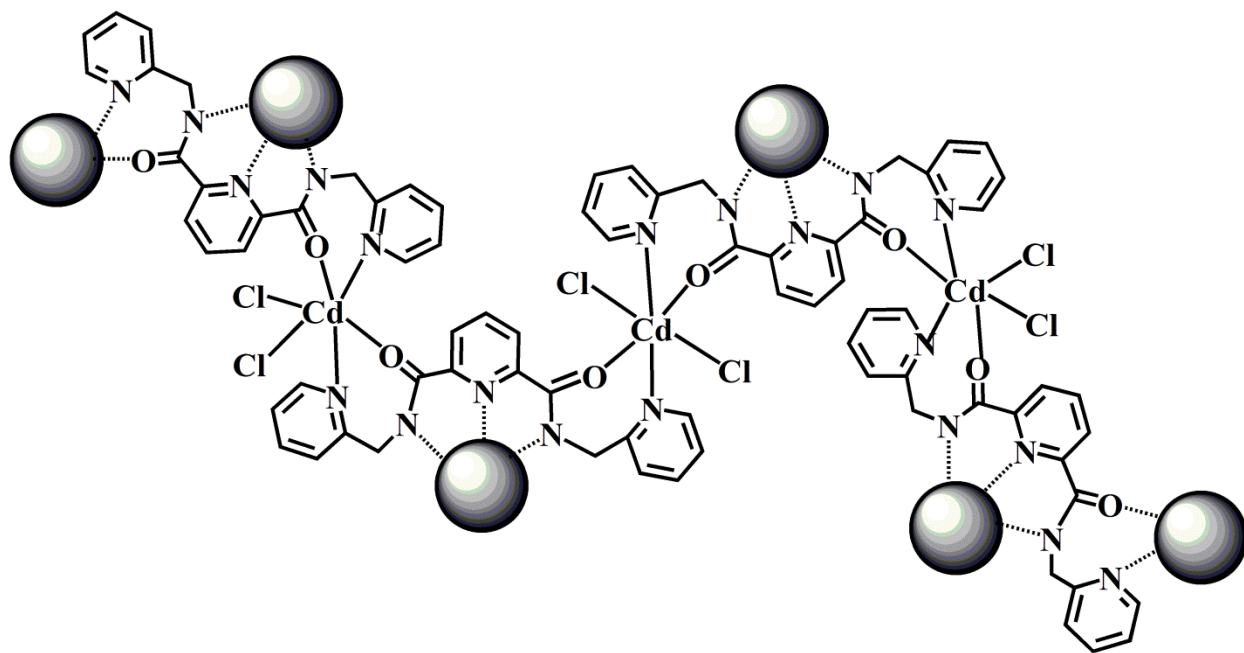

**Chart B.** Showing six vacant coordination sites for further growth.

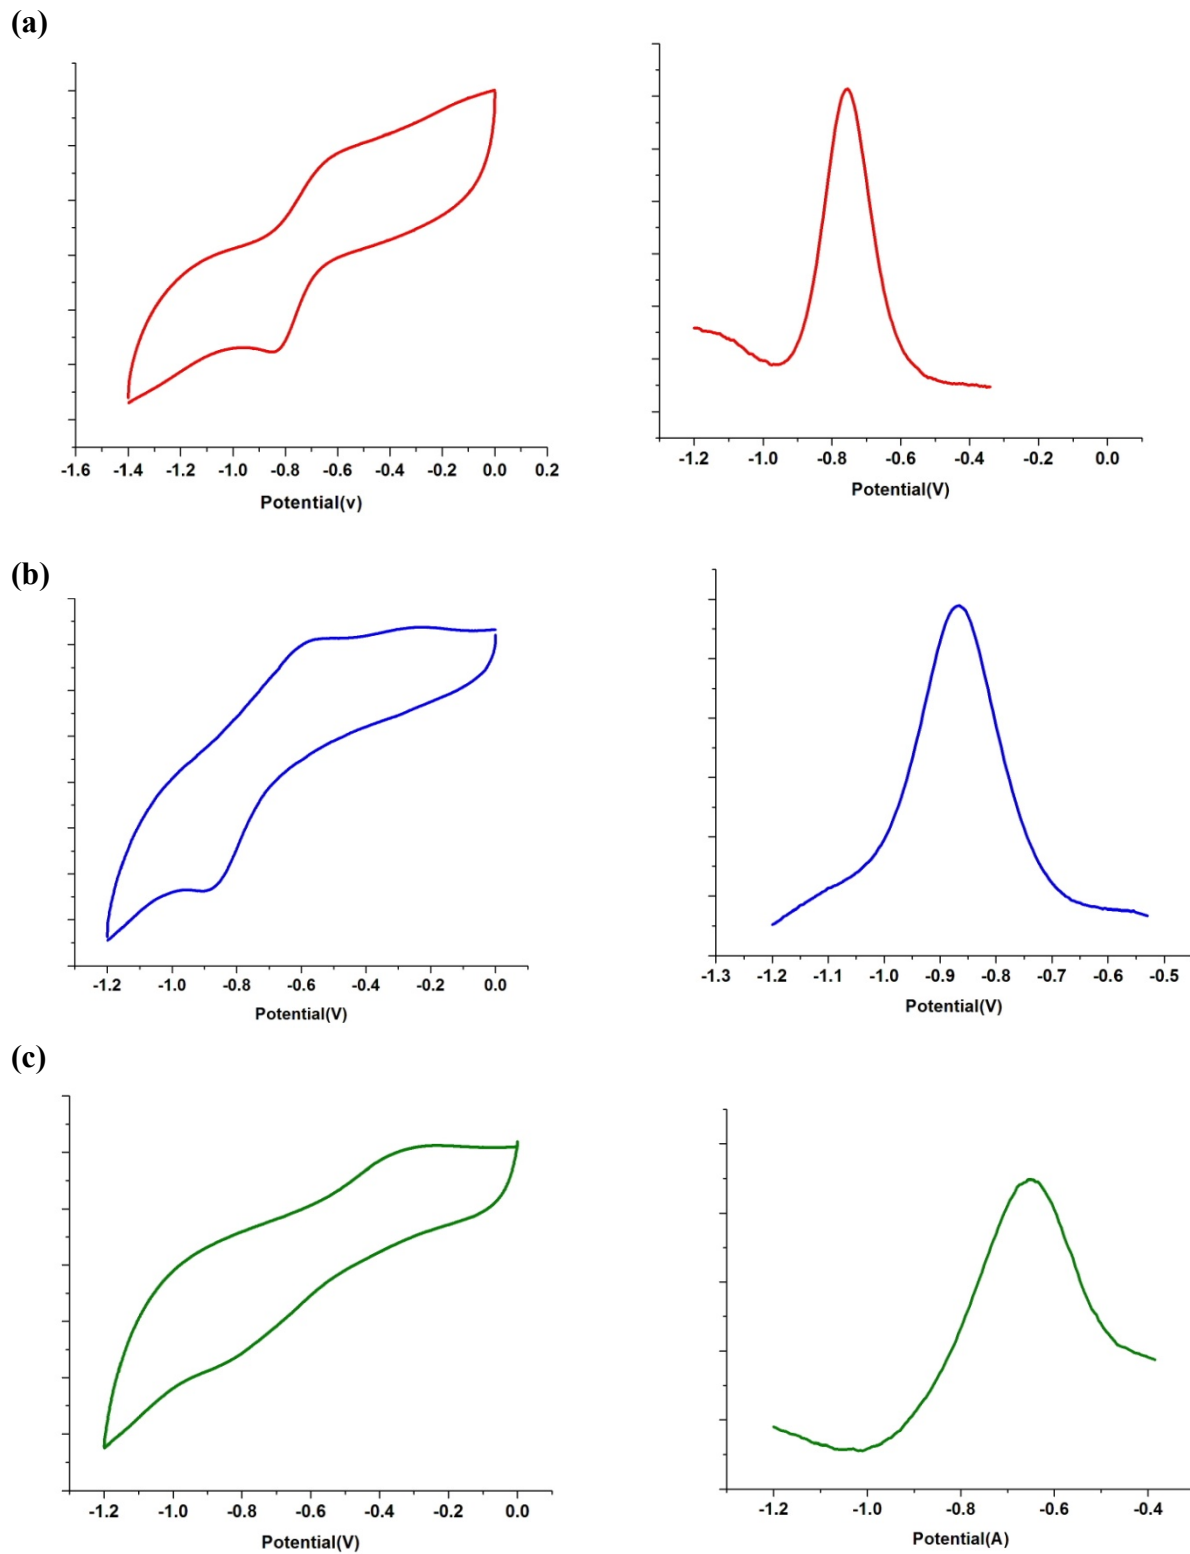

**Fig. S8.** Cyclic voltammograms and Differential potential voltammograms of  $\text{H}_2\text{L}$  (a) Complexes **1**(b) **2**(c) at 0.001M concentration in 0.1M TBAPF6 in DMSO recorded at a scan rate of 100 mV s<sup>-1</sup>.



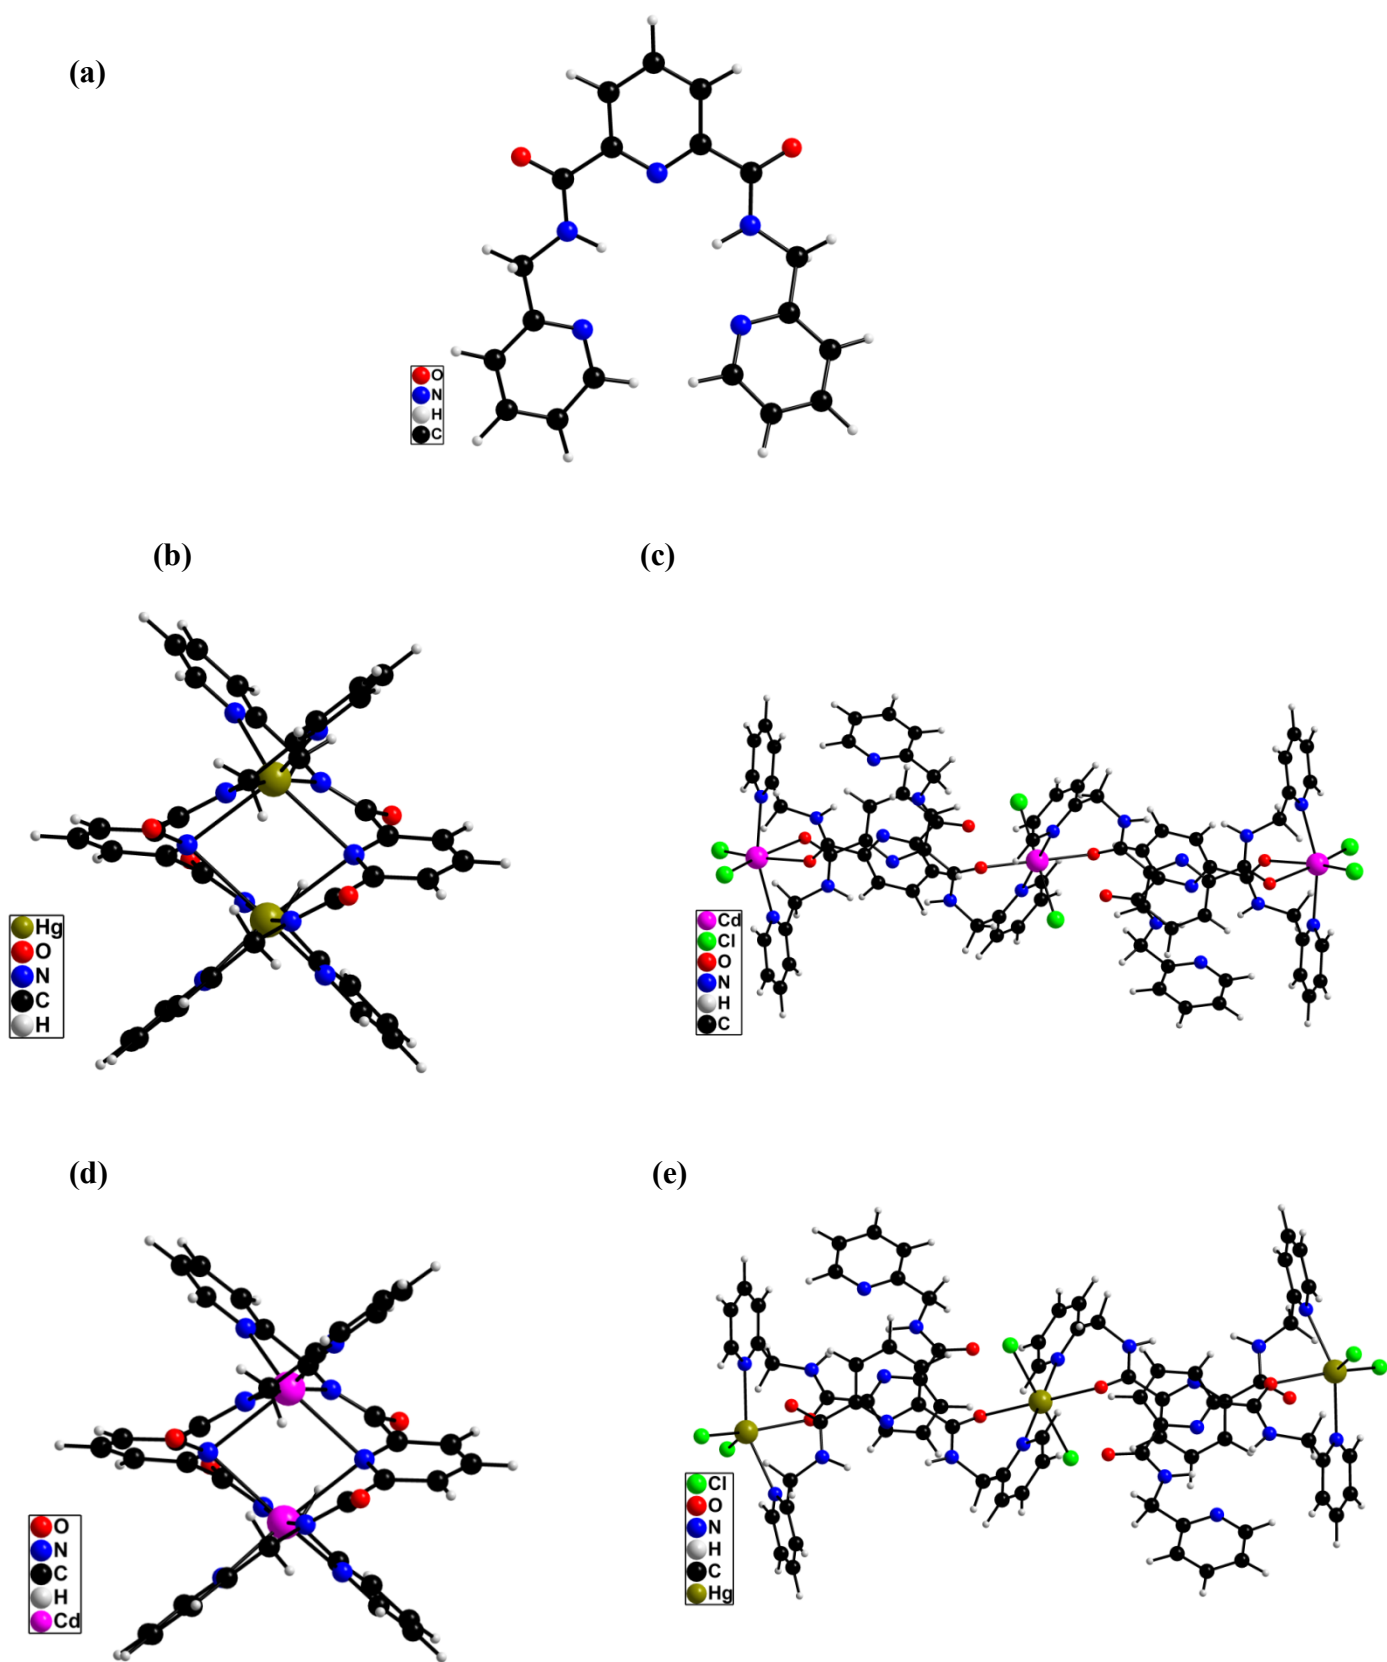

**Fig. S9.** Optimized structures of  $H_2L$  (a), 1 (b), 2 (c), Cd analogue of 1 (d) and Hg analogue of 2 (e)

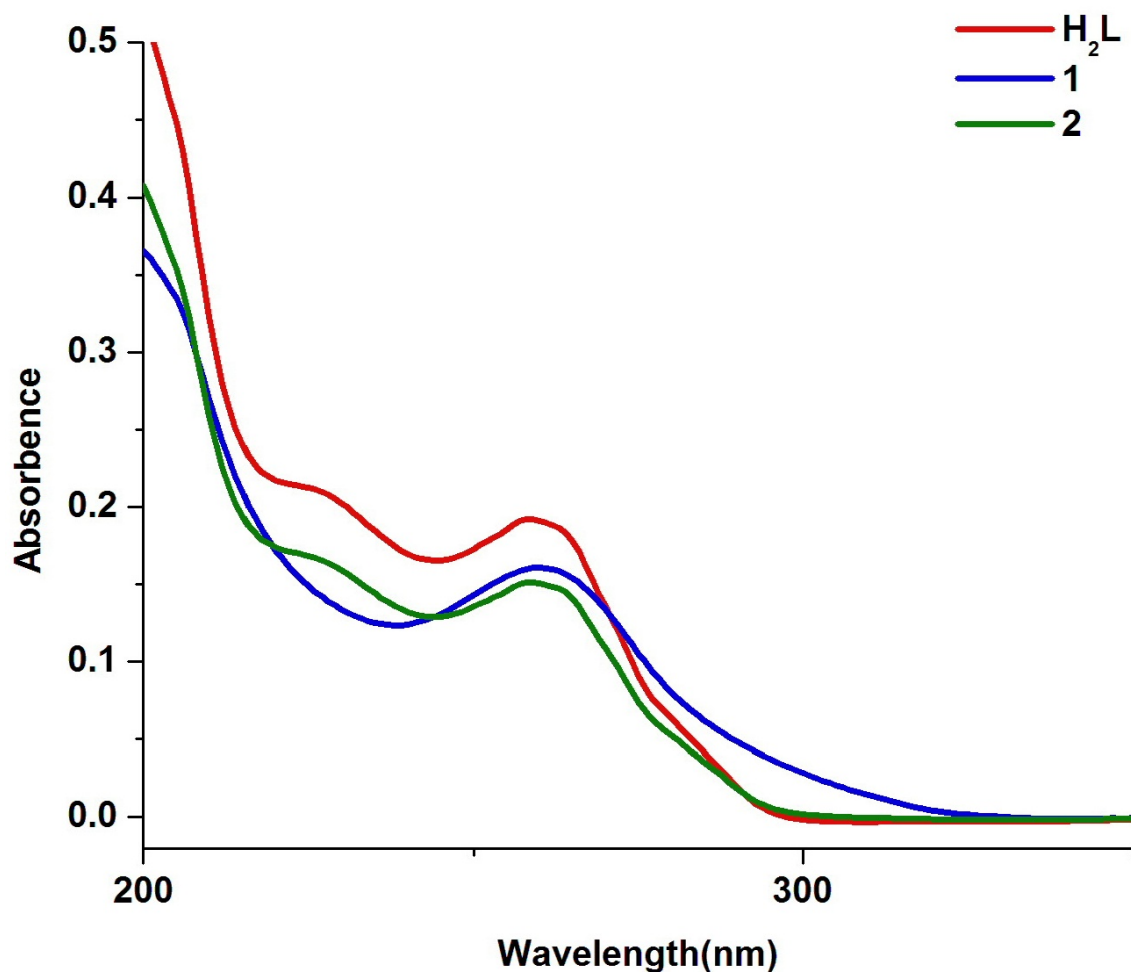

Fig. S10. Uv-Vis spectra of  $H_2L$ , complexes 1 and 2.

**Table-S4:** Cartesian coordinates (Å) for calculated geometry of **H<sub>2</sub>L**

|   |           |           |           |
|---|-----------|-----------|-----------|
| O | -2.740400 | -3.494600 | 0.769100  |
| O | -2.742700 | 3.492900  | -0.768900 |
| N | -2.215600 | -0.000700 | 0.000000  |
| N | -0.794900 | -2.344200 | 0.284500  |
| H | -0.350100 | -1.471200 | 0.004200  |
| N | -0.796500 | 2.343900  | -0.284300 |
| H | -0.351000 | 1.471200  | -0.003900 |
| N | 1.737000  | -1.978100 | -0.473600 |
| N | 1.735500  | 1.979300  | 0.474000  |
| C | -2.909600 | -1.144600 | 0.225000  |
| C | -4.317700 | -1.187900 | 0.242500  |
| H | -4.803100 | -2.137300 | 0.439400  |
| C | -5.031300 | -0.001600 | -0.000300 |
| H | -6.117700 | -0.002000 | -0.000400 |
| C | -4.318500 | 1.185100  | -0.242900 |
| H | -4.804500 | 2.134200  | -0.439800 |
| C | -2.910400 | 1.142800  | -0.225200 |
| C | -2.140800 | -2.423100 | 0.455300  |
| C | -2.142400 | 2.421800  | -0.455200 |
| C | 0.051600  | -3.519800 | 0.434300  |
| H | 0.078300  | -3.843500 | 1.486800  |
| H | -0.383700 | -4.361200 | -0.123700 |
| C | 1.463400  | -3.237900 | -0.053400 |
| C | 2.441100  | -4.256300 | -0.061300 |

|   |           |           |           |
|---|-----------|-----------|-----------|
| H | 2.187800  | -5.255700 | 0.282900  |
| C | 3.732600  | -3.956200 | -0.522900 |
| H | 4.501700  | -4.723900 | -0.542300 |
| C | 4.015300  | -2.647000 | -0.964900 |
| H | 4.999400  | -2.375400 | -1.334500 |
| C | 2.985900  | -1.691900 | -0.920000 |
| H | 3.149400  | -0.670000 | -1.251700 |
| C | 0.049200  | 3.520000  | -0.433700 |
| H | 0.075500  | 3.844200  | -1.486100 |
| H | -0.386500 | 4.361000  | 0.124700  |
| C | 1.461200  | 3.238800  | 0.053600  |
| C | 2.438500  | 4.257700  | 0.061000  |
| H | 2.184800  | 5.256900  | -0.283300 |
| C | 3.730300  | 3.958300  | 0.522400  |
| H | 4.499000  | 4.726300  | 0.541500  |
| C | 4.013700  | 2.649300  | 0.964700  |
| H | 4.998000  | 2.378200  | 1.334100  |
| C | 2.984700  | 1.693700  | 0.920200  |
| H | 3.148700  | 0.671900  | 1.252000  |

**Table S5**-Cartesian coordinates (Å) for calculated geometry of **1**

|    |           |           |           |
|----|-----------|-----------|-----------|
| Hg | -1.792900 | -0.000300 | -0.000300 |
| Hg | 1.791900  | 0.000300  | 0.000000  |
| O  | -0.707100 | 3.466600  | 2.566100  |
| O  | 0.708600  | 3.482600  | -2.546800 |

|   |           |           |           |
|---|-----------|-----------|-----------|
| O | -0.705200 | -3.467300 | -2.565600 |
| O | 0.708900  | -3.482800 | 2.545600  |
| N | 0.001000  | 0.006400  | -2.142000 |
| N | -1.580400 | -2.052100 | -0.912700 |
| N | -3.262600 | -1.604900 | 1.298600  |
| N | 1.582500  | 2.057700  | -0.901600 |
| N | 3.260100  | 1.596700  | 1.310400  |
| N | 0.000900  | -0.006700 | 2.141800  |
| N | 1.583100  | -2.057300 | 0.901100  |
| N | 3.262000  | -1.595300 | -1.309500 |
| N | -3.262500 | 1.604100  | -1.299400 |
| N | -1.580900 | 2.051500  | 0.912400  |
| C | 0.418200  | 1.111400  | -2.822500 |
| C | 0.390400  | 1.162500  | -4.229500 |
| H | 0.681000  | 2.085000  | -4.719100 |
| C | -0.000800 | 0.014800  | -4.942100 |
| H | -0.001500 | 0.018100  | -6.029200 |
| C | -0.391100 | -1.137100 | -4.235900 |
| H | -0.682300 | -2.056600 | -4.730700 |
| C | -0.417000 | -1.094400 | -2.828600 |
| C | -0.914700 | -2.306100 | -2.060900 |
| C | -2.052600 | -3.221800 | -0.168900 |
| H | -1.204900 | -3.753100 | 0.299000  |
| H | -2.507900 | -3.951100 | -0.857500 |
| C | -3.047600 | -2.895200 | 0.935800  |

|   |           |           |           |
|---|-----------|-----------|-----------|
| C | -3.718700 | -3.948500 | 1.598800  |
| H | -3.523400 | -4.974400 | 1.299400  |
| C | -4.614800 | -3.657500 | 2.635800  |
| H | -5.133900 | -4.459400 | 3.154200  |
| C | -4.832100 | -2.311200 | 2.999400  |
| H | -5.516300 | -2.041100 | 3.797400  |
| C | -4.132000 | -1.317400 | 2.304200  |
| H | -4.255000 | -0.265700 | 2.547600  |
| C | 0.917000  | 2.318500  | -2.048300 |
| C | 2.056100  | 3.223000  | -0.151800 |
| H | 1.208800  | 3.754600  | 0.316400  |
| H | 2.514800  | 3.954000  | -0.836200 |
| C | 3.047900  | 2.889100  | 0.953700  |
| C | 3.719000  | 3.938000  | 1.623700  |
| H | 3.526100  | 4.965700  | 1.329200  |
| C | 4.612200  | 3.640200  | 2.661400  |
| H | 5.131300  | 4.438500  | 3.185200  |
| C | 4.826300  | 2.291700  | 3.018600  |
| H | 5.508200  | 2.016500  | 3.816900  |
| C | 4.126400  | 1.302600  | 2.316600  |
| H | 4.247000  | 0.249400  | 2.554900  |
| C | -0.417900 | 1.093700  | 2.828500  |
| C | -0.392400 | 1.136000  | 4.235800  |
| H | -0.684200 | 2.055300  | 4.730800  |
| C | -0.002000 | -0.016000 | 4.941900  |

|   |           |           |           |
|---|-----------|-----------|-----------|
| H | -0.003000 | -0.019500 | 6.028900  |
| C | 0.389800  | -1.163300 | 4.229000  |
| H | 0.680500  | -2.085900 | 4.718400  |
| C | 0.418000  | -1.111800 | 2.822000  |
| C | 0.917300  | -2.318500 | 2.047600  |
| C | 2.057200  | -3.222200 | 0.151100  |
| H | 1.210200  | -3.753000 | -0.318700 |
| H | 2.514700  | -3.954000 | 0.835500  |
| C | 3.050500  | -2.887800 | -0.952800 |
| C | 3.723600  | -3.936200 | -1.621600 |
| H | 3.531200  | -4.964000 | -1.327200 |
| C | 4.618000  | -3.637800 | -2.658100 |
| H | 5.138600  | -4.435700 | -3.180900 |
| C | 4.831400  | -2.289100 | -3.015300 |
| H | 5.514200  | -2.013500 | -3.812600 |
| C | 4.129600  | -1.300500 | -2.314500 |
| H | 4.249600  | -0.247300 | -2.552800 |
| C | -4.131500 | 1.316500  | -2.305300 |
| H | -4.254200 | 0.264800  | -2.548900 |
| C | -4.831500 | 2.310200  | -3.000700 |
| H | -5.515400 | 2.040100  | -3.799000 |
| C | -4.614700 | 3.656500  | -2.636900 |
| H | -5.133700 | 4.458300  | -3.155400 |
| C | -3.718900 | 3.947600  | -1.599500 |
| H | -3.524000 | 4.973500  | -1.300000 |

|   |           |          |           |
|---|-----------|----------|-----------|
| C | -3.048000 | 2.894300 | -0.936300 |
| C | -2.053400 | 3.221100 | 0.168800  |
| H | -1.205800 | 3.752900 | -0.298700 |
| H | -2.509300 | 3.950000 | 0.857400  |
| C | -0.915800 | 2.305400 | 2.061000  |

**Table S6**-Cartesian coordinates (Å) for calculated geometry of **2**

|    |           |           |           |
|----|-----------|-----------|-----------|
| Cd | 6.750700  | 5.298000  | -7.157000 |
| Cd | 0.000000  | 0.000000  | 0.000000  |
| Cl | 7.782500  | 3.788900  | -8.955500 |
| Cl | 7.034400  | 7.839800  | -7.533200 |
| Cl | -2.251200 | 1.278200  | -0.292600 |
| O  | 1.132200  | 1.457400  | -1.446600 |
| O  | 6.193700  | 3.133000  | -5.998300 |
| N  | 3.376900  | 1.826100  | -4.185200 |
| N  | 0.786500  | 0.849600  | -3.651000 |
| H  | 1.238900  | 0.712300  | -4.548900 |
| N  | 4.118300  | 2.447800  | -6.766700 |
| H  | 3.216100  | 2.089800  | -6.468100 |
| N  | -0.619700 | -1.370200 | -1.954800 |
| N  | 4.482700  | 5.262900  | -8.167100 |
| C  | 3.021600  | 1.495000  | -2.918400 |
| C  | 3.946600  | 1.376600  | -1.861700 |
| H  | 3.597100  | 1.045800  | -0.888700 |
| C  | 5.297000  | 1.661400  | -2.128800 |



|   |           |           |           |
|---|-----------|-----------|-----------|
| H | 6.041900  | 1.566600  | -1.344600 |
| C | 5.666500  | 2.076600  | -3.419700 |
| H | 6.684400  | 2.345900  | -3.678600 |
| C | 4.677200  | 2.138500  | -4.420200 |
| C | 1.568600  | 1.263600  | -2.623600 |
| C | 5.057800  | 2.611700  | -5.798600 |
| C | -0.653900 | 0.552600  | -3.498000 |
| H | -1.162100 | 0.845200  | -4.422900 |
| H | -1.052300 | 1.158300  | -2.674300 |
| C | -0.928700 | -0.915900 | -3.202600 |
| C | -1.495200 | -1.766800 | -4.169800 |
| H | -1.736800 | -1.377700 | -5.155100 |
| C | -1.758200 | -3.110000 | -3.840200 |
| H | -2.209700 | -3.778600 | -4.568300 |
| C | -1.435300 | -3.576100 | -2.553900 |
| H | -1.650200 | -4.596800 | -2.251800 |
| C | -0.856000 | -2.671100 | -1.646100 |
| H | -0.583400 | -2.975900 | -0.641400 |
| C | 4.355900  | 2.800100  | -8.180600 |
| H | 3.903600  | 2.022900  | -8.806400 |
| H | 5.439000  | 2.802900  | -8.360800 |
| C | 3.783400  | 4.158500  | -8.557100 |
| C | 2.583800  | 4.270300  | -9.286300 |
| H | 2.060100  | 3.372100  | -9.601600 |
| C | 2.087700  | 5.546300  | -9.612300 |

|   |          |          |            |
|---|----------|----------|------------|
| H | 1.167900 | 5.651600 | -10.181700 |
| C | 2.808700 | 6.678600 | -9.197700  |
| H | 2.472300 | 7.683200 | -9.433000  |
| C | 4.004200 | 6.496400 | -8.479400  |
| H | 4.621800 | 7.333700 | -8.164600  |
| O | 2.899800 | 6.312000 | 1.480300   |
| O | 5.428700 | 5.814200 | -5.177200  |
| N | 4.570600 | 6.349900 | -1.721900  |
| N | 4.949800 | 7.180000 | 0.850100   |
| H | 5.613800 | 7.362700 | 0.099000   |
| N | 6.678300 | 6.676700 | -3.418700  |
| H | 6.636500 | 6.891300 | -2.425600  |
| N | 7.275300 | 8.461100 | 0.928800   |
| N | 8.580400 | 5.051800 | -5.543700  |
| C | 3.542900 | 6.189000 | -0.851500  |
| C | 2.289300 | 5.685500 | -1.248900  |
| H | 1.506200 | 5.581300 | -0.506700  |
| C | 2.096700 | 5.341800 | -2.597800  |
| H | 1.138400 | 4.957000 | -2.933500  |
| C | 3.161100 | 5.500100 | -3.502100  |
| H | 3.075500 | 5.253200 | -4.554100  |
| C | 4.383900 | 6.002900 | -3.019000  |
| C | 3.770500 | 6.564400 | 0.593000   |
| C | 5.549600 | 6.161700 | -3.964400  |
| C | 5.325700 | 7.629500 | 2.182400   |

|    |           |           |           |
|----|-----------|-----------|-----------|
| H  | 5.409000  | 6.771900  | 2.867500  |
| H  | 4.538000  | 8.273600  | 2.598900  |
| C  | 6.647100  | 8.383100  | 2.130000  |
| C  | 7.184100  | 8.973700  | 3.292900  |
| H  | 6.653700  | 8.893300  | 4.238100  |
| C  | 8.402500  | 9.666000  | 3.205600  |
| H  | 8.835000  | 10.131700 | 4.086900  |
| C  | 9.053000  | 9.751700  | 1.957800  |
| H  | 9.993600  | 10.281700 | 1.845500  |
| C  | 8.451600  | 9.133800  | 0.849200  |
| H  | 8.914400  | 9.177800  | -0.133100 |
| C  | 7.888000  | 7.006500  | -4.201800 |
| H  | 8.428400  | 7.782100  | -3.649200 |
| H  | 7.585600  | 7.425500  | -5.170800 |
| C  | 8.811100  | 5.817300  | -4.440000 |
| C  | 9.880900  | 5.532700  | -3.567500 |
| H  | 10.050500 | 6.165000  | -2.700400 |
| C  | 10.724000 | 4.439400  | -3.837900 |
| H  | 11.557500 | 4.210000  | -3.178900 |
| C  | 10.477300 | 3.658400  | -4.980800 |
| H  | 11.108300 | 2.813400  | -5.237500 |
| C  | 9.394500  | 3.996500  | -5.810500 |
| H  | 9.164900  | 3.442700  | -6.717200 |
| Cd | -6.750700 | -5.298000 | 7.157000  |
| Cl | -7.782500 | -3.788900 | 8.955500  |

|    |           |           |          |
|----|-----------|-----------|----------|
| Cl | -7.034400 | -7.839800 | 7.533200 |
| Cl | 2.251200  | -1.278200 | 0.292600 |
| O  | -1.132200 | -1.457400 | 1.446600 |
| O  | -6.193700 | -3.133000 | 5.998300 |
| N  | -3.376900 | -1.826100 | 4.185200 |
| N  | -0.786500 | -0.849600 | 3.651000 |
| H  | -1.238900 | -0.712300 | 4.548900 |
| N  | -4.118300 | -2.447800 | 6.766700 |
| H  | -3.216100 | -2.089800 | 6.468100 |
| N  | 0.619700  | 1.370200  | 1.954800 |
| N  | -4.482700 | -5.262900 | 8.167100 |
| C  | -3.021600 | -1.495000 | 2.918400 |
| C  | -3.946600 | -1.376600 | 1.861700 |
| H  | -3.597100 | -1.045800 | 0.888700 |
| C  | -5.297000 | -1.661400 | 2.128800 |
| H  | -6.041900 | -1.566600 | 1.344600 |
| C  | -5.666500 | -2.076600 | 3.419700 |
| H  | -6.684400 | -2.345900 | 3.678600 |
| C  | -4.677200 | -2.138500 | 4.420200 |
| C  | -1.568600 | -1.263600 | 2.623600 |
| C  | -5.057800 | -2.611700 | 5.798600 |
| C  | 0.653900  | -0.552600 | 3.498000 |
| H  | 1.162100  | -0.845200 | 4.422900 |
| H  | 1.052300  | -1.158300 | 2.674300 |
| C  | 0.928700  | 0.915900  | 3.202600 |

|   |           |           |           |
|---|-----------|-----------|-----------|
| C | 1.495200  | 1.766800  | 4.169800  |
| H | 1.736800  | 1.377700  | 5.155100  |
| C | 1.758200  | 3.110000  | 3.840200  |
| H | 2.209700  | 3.778600  | 4.568300  |
| C | 1.435300  | 3.576100  | 2.553900  |
| H | 1.650200  | 4.596800  | 2.251800  |
| C | 0.856000  | 2.671100  | 1.646100  |
| H | 0.583400  | 2.975900  | 0.641400  |
| C | -4.355900 | -2.800100 | 8.180600  |
| H | -3.903600 | -2.022900 | 8.806400  |
| H | -5.439000 | -2.802900 | 8.360800  |
| C | -3.783400 | -4.158500 | 8.557100  |
| C | -2.583800 | -4.270300 | 9.286300  |
| H | -2.060100 | -3.372100 | 9.601600  |
| C | -2.087700 | -5.546300 | 9.612300  |
| H | -1.167900 | -5.651600 | 10.181700 |
| C | -2.808700 | -6.678600 | 9.197700  |
| H | -2.472300 | -7.683200 | 9.433000  |
| C | -4.004200 | -6.496400 | 8.479400  |
| H | -4.621800 | -7.333700 | 8.164600  |
| O | -2.899800 | -6.312000 | -1.480300 |
| O | -5.428700 | -5.814200 | 5.177200  |
| N | -4.570600 | -6.349900 | 1.721900  |
| N | -4.949800 | -7.180000 | -0.850100 |
| H | -5.613800 | -7.362700 | -0.099000 |

|   |           |            |           |
|---|-----------|------------|-----------|
| N | -6.678300 | -6.676700  | 3.418700  |
| H | -6.636500 | -6.891300  | 2.425600  |
| N | -7.275300 | -8.461100  | -0.928800 |
| N | -8.580400 | -5.051800  | 5.543700  |
| C | -3.542900 | -6.189000  | 0.851500  |
| C | -2.289300 | -5.685500  | 1.248900  |
| H | -1.506200 | -5.581300  | 0.506700  |
| C | -2.096700 | -5.341800  | 2.597800  |
| H | -1.138400 | -4.957000  | 2.933500  |
| C | -3.161100 | -5.500100  | 3.502100  |
| H | -3.075500 | -5.253200  | 4.554100  |
| C | -4.383900 | -6.002900  | 3.019000  |
| C | -3.770500 | -6.564400  | -0.593000 |
| C | -5.549600 | -6.161700  | 3.964400  |
| C | -5.325700 | -7.629500  | -2.182400 |
| H | -5.409000 | -6.771900  | -2.867500 |
| H | -4.538000 | -8.273600  | -2.598900 |
| C | -6.647100 | -8.383100  | -2.130000 |
| C | -7.184100 | -8.973700  | -3.292900 |
| H | -6.653700 | -8.893300  | -4.238100 |
| C | -8.402500 | -9.666000  | -3.205600 |
| H | -8.835000 | -10.131700 | -4.086900 |
| C | -9.053000 | -9.751700  | -1.957800 |
| H | -9.993600 | -10.281700 | -1.845500 |
| C | -8.451600 | -9.133800  | -0.849200 |

|   |            |           |          |
|---|------------|-----------|----------|
| H | -8.914400  | -9.177800 | 0.133100 |
| C | -7.888000  | -7.006500 | 4.201800 |
| H | -8.428400  | -7.782100 | 3.649200 |
| H | -7.585600  | -7.425500 | 5.170800 |
| C | -8.811100  | -5.817300 | 4.440000 |
| C | -9.880900  | -5.532700 | 3.567500 |
| H | -10.050500 | -6.165000 | 2.700400 |
| C | -10.724000 | -4.439400 | 3.837900 |
| H | -11.557500 | -4.210000 | 3.178900 |
| C | -10.477300 | -3.658400 | 4.980800 |
| H | -11.108300 | -2.813400 | 5.237500 |
| C | -9.394500  | -3.996500 | 5.810500 |
| H | -9.164900  | -3.442700 | 6.717200 |

**Table S7**-Cartesian coordinates (Å) for calculated geometry of Cd analogue of **1**

|   |           |           |           |
|---|-----------|-----------|-----------|
| O | -0.672200 | -2.498200 | 3.458800  |
| O | 0.690100  | 2.422400  | 3.516600  |
| O | -0.672900 | 2.496900  | -3.459200 |
| O | 0.684900  | -2.421600 | -3.518100 |
| N | 0.006900  | 2.053300  | 0.024200  |
| N | -1.565100 | 0.863100  | -2.018800 |
| N | -3.135500 | -1.344700 | -1.439000 |
| N | 1.577500  | 0.818800  | 2.039500  |
| N | 3.124100  | -1.390600 | 1.406900  |
| N | 0.005300  | -2.053700 | -0.024800 |

|   |           |           |           |
|---|-----------|-----------|-----------|
| N | 1.575500  | -0.819800 | -2.041000 |
| N | 3.124400  | 1.388200  | -1.408700 |
| N | -3.131100 | 1.347800  | 1.442000  |
| N | -1.564600 | -0.863500 | 2.019700  |
| C | 0.403000  | 2.730400  | 1.143300  |
| C | 0.370800  | 4.136100  | 1.204700  |
| H | 0.643800  | 4.616600  | 2.137500  |
| C | 0.003600  | 4.858800  | 0.055700  |
| H | 0.002400  | 5.945900  | 0.067900  |
| C | -0.362100 | 4.161300  | -1.109200 |
| H | -0.636100 | 4.662000  | -2.031000 |
| C | -0.390900 | 2.754400  | -1.079300 |
| C | -0.889700 | 1.996200  | -2.297500 |
| C | -2.064400 | 0.100800  | -3.164400 |
| H | -1.230400 | -0.340000 | -3.738300 |
| H | -2.590800 | 0.759300  | -3.874400 |
| C | -2.991000 | -1.035100 | -2.755900 |
| C | -3.673800 | -1.777300 | -3.746000 |
| H | -3.532600 | -1.521100 | -4.792100 |
| C | -4.509600 | -2.836400 | -3.368300 |
| H | -5.037100 | -3.415300 | -4.121800 |
| C | -4.653800 | -3.144400 | -1.998500 |
| H | -5.289000 | -3.957700 | -1.662500 |
| C | -3.945300 | -2.374200 | -1.068900 |
| H | -4.010700 | -2.573000 | -0.002800 |



|   |           |           |           |
|---|-----------|-----------|-----------|
| C | 0.904000  | 1.946200  | 2.344000  |
| C | 2.078200  | 0.031200  | 3.167000  |
| H | 1.244600  | -0.411100 | 3.740100  |
| H | 2.617400  | 0.671300  | 3.884300  |
| C | 2.989500  | -1.106700 | 2.730500  |
| C | 3.668100  | -1.877100 | 3.701700  |
| H | 3.534900  | -1.641000 | 4.753600  |
| C | 4.489300  | -2.938200 | 3.298200  |
| H | 5.013400  | -3.538700 | 4.037000  |
| C | 4.623000  | -3.219800 | 1.921600  |
| H | 5.246500  | -4.033600 | 1.565900  |
| C | 3.919500  | -2.422000 | 1.011700  |
| H | 3.977500  | -2.599400 | -0.058700 |
| C | -0.392100 | -2.755000 | 1.078700  |
| C | -0.364400 | -4.161900 | 1.107900  |
| H | -0.637900 | -4.662800 | 2.029600  |
| C | -0.000300 | -4.859200 | -0.057700 |
| H | -0.002300 | -5.946300 | -0.070400 |
| C | 0.366500  | -4.136300 | -1.206700 |
| H | 0.638100  | -4.616500 | -2.140000 |
| C | 0.399900  | -2.730600 | -1.144700 |
| C | 0.900500  | -1.946300 | -2.345400 |
| C | 2.076000  | -0.032000 | -3.168500 |
| H | 1.242200  | 0.411600  | -3.740400 |
| H | 2.613700  | -0.672200 | -3.886800 |

|    |           |           |           |
|----|-----------|-----------|-----------|
| C  | 2.988900  | 1.104700  | -2.732300 |
| C  | 3.668000  | 1.874400  | -3.703600 |
| H  | 3.534200  | 1.638700  | -4.755400 |
| C  | 4.490400  | 2.934500  | -3.300200 |
| H  | 5.015000  | 3.534600  | -4.039100 |
| C  | 4.625000  | 3.215800  | -1.923600 |
| H  | 5.249500  | 4.029000  | -1.568000 |
| C  | 3.921000  | 2.418600  | -1.013500 |
| H  | 3.979700  | 2.595800  | 0.056800  |
| C  | -3.938500 | 2.379600  | 1.072900  |
| H  | -4.004500 | 2.578900  | 0.006900  |
| C  | -4.644000 | 3.151400  | 2.003400  |
| H  | -5.277400 | 3.966500  | 1.668300  |
| C  | -4.499300 | 2.842700  | 3.373000  |
| H  | -5.024400 | 3.422800  | 4.127200  |
| C  | -3.665900 | 1.781200  | 3.749500  |
| H  | -3.524300 | 1.524400  | 4.795500  |
| C  | -2.986100 | 1.037500  | 2.758600  |
| C  | -2.062300 | -0.101200 | 3.165900  |
| H  | -1.227400 | 0.336900  | 3.740600  |
| H  | -2.590500 | -0.759100 | 3.875100  |
| C  | -0.889600 | -1.997000 | 2.297400  |
| Cd | 1.748400  | -0.000900 | -0.000700 |
| Cd | -1.749900 | 0.000300  | 0.000700  |

**Table S8**-Cartesian coordinates (Å) for calculated geometry of Hg analogue of **2**

|    |           |           |           |
|----|-----------|-----------|-----------|
| Cl | 7.859700  | 3.952800  | -9.111900 |
| Cl | 6.687000  | 8.043200  | -7.384700 |
| Cl | -2.317600 | 1.204500  | -0.293600 |
| O  | 1.148900  | 1.628500  | -1.548100 |
| O  | 6.335500  | 2.926700  | -6.098700 |
| N  | 3.453600  | 1.805900  | -4.249300 |
| N  | 0.853800  | 0.849800  | -3.711200 |
| H  | 1.330300  | 0.643100  | -4.583000 |
| N  | 4.199900  | 2.380600  | -6.825000 |
| H  | 3.282200  | 2.089300  | -6.501600 |
| N  | -0.605700 | -1.389200 | -2.101100 |
| N  | 4.362600  | 5.193700  | -8.215000 |
| C  | 3.075600  | 1.530400  | -2.975800 |
| C  | 3.985600  | 1.443000  | -1.903500 |
| H  | 3.620400  | 1.165100  | -0.920500 |
| C  | 5.344600  | 1.689000  | -2.165200 |
| H  | 6.077600  | 1.614300  | -1.367600 |
| C  | 5.738600  | 2.039500  | -3.468000 |
| H  | 6.764700  | 2.276200  | -3.726300 |
| C  | 4.762700  | 2.083100  | -4.481800 |
| C  | 1.612700  | 1.337200  | -2.694400 |
| C  | 5.168200  | 2.496500  | -5.873700 |
| C  | -0.592100 | 0.577000  | -3.586500 |
| H  | -1.086600 | 0.904200  | -4.508000 |

|   |           |           |            |
|---|-----------|-----------|------------|
| H | -0.984400 | 1.170700  | -2.752700  |
| C | -0.902500 | -0.892900 | -3.334400  |
| C | -1.492300 | -1.703300 | -4.322900  |
| H | -1.724800 | -1.283500 | -5.297900  |
| C | -1.789700 | -3.047500 | -4.026600  |
| H | -2.258100 | -3.685000 | -4.771700  |
| C | -1.481900 | -3.555300 | -2.752100  |
| H | -1.724700 | -4.576500 | -2.473100  |
| C | -0.879800 | -2.687900 | -1.821600  |
| H | -0.622200 | -3.022900 | -0.821900  |
| C | 4.416600  | 2.727400  | -8.240700  |
| H | 4.015000  | 1.920400  | -8.864800  |
| H | 5.497100  | 2.792800  | -8.416700  |
| C | 3.754900  | 4.043600  | -8.622700  |
| C | 2.557600  | 4.075200  | -9.364100  |
| H | 2.104800  | 3.144700  | -9.695200  |
| C | 1.970100  | 5.315100  | -9.678200  |
| H | 1.050300  | 5.358500  | -10.255600 |
| C | 2.597500  | 6.493700  | -9.240300  |
| H | 2.185800  | 7.472800  | -9.463600  |
| C | 3.797800  | 6.392100  | -8.513500  |
| H | 4.345200  | 7.269200  | -8.177300  |
| O | 2.924700  | 6.277700  | 1.634800   |
| O | 5.369200  | 5.640100  | -5.045800  |
| N | 4.540900  | 6.263200  | -1.596100  |

|   |          |           |           |
|---|----------|-----------|-----------|
| N | 4.951200 | 7.156500  | 0.947700  |
| H | 5.600600 | 7.326100  | 0.181100  |
| N | 6.603000 | 6.617600  | -3.331300 |
| H | 6.556100 | 6.868100  | -2.347000 |
| N | 7.276200 | 8.443000  | 0.962800  |
| N | 8.577600 | 5.098600  | -5.543900 |
| C | 3.531900 | 6.101300  | -0.704200 |
| C | 2.285700 | 5.555700  | -1.066400 |
| H | 1.517300 | 5.452400  | -0.309200 |
| C | 2.080300 | 5.168500  | -2.401400 |
| H | 1.127600 | 4.747600  | -2.707400 |
| C | 3.125600 | 5.327400  | -3.327300 |
| H | 3.030100 | 5.046200  | -4.369800 |
| C | 4.342800 | 5.874500  | -2.879600 |
| C | 3.776100 | 6.519000  | 0.725700  |
| C | 5.489300 | 6.038700  | -3.849200 |
| C | 5.344100 | 7.640900  | 2.262500  |
| H | 5.432300 | 6.801800  | 2.969300  |
| H | 4.563800 | 8.299000  | 2.671300  |
| C | 6.667000 | 8.388600  | 2.175000  |
| C | 7.224300 | 8.998500  | 3.318400  |
| H | 6.708900 | 8.936600  | 4.273200  |
| C | 8.443300 | 9.684900  | 3.199400  |
| H | 8.891100 | 10.164800 | 4.065300  |
| C | 9.074200 | 9.746000  | 1.940200  |

|    |           |           |           |
|----|-----------|-----------|-----------|
| H  | 10.014500 | 10.270700 | 1.803500  |
| C  | 8.453200  | 9.110400  | 0.852600  |
| H  | 8.900400  | 9.135400  | -0.137500 |
| C  | 7.794800  | 6.966500  | -4.130500 |
| H  | 8.331600  | 7.747700  | -3.581700 |
| H  | 7.473400  | 7.389300  | -5.090100 |
| C  | 8.731500  | 5.789500  | -4.381600 |
| C  | 9.734200  | 5.435100  | -3.455700 |
| H  | 9.845600  | 6.005800  | -2.537800 |
| C  | 10.584400 | 4.350600  | -3.737800 |
| H  | 11.366300 | 4.067400  | -3.037700 |
| C  | 10.413700 | 3.646500  | -4.943700 |
| H  | 11.051700 | 2.808800  | -5.206700 |
| C  | 9.395200  | 4.050700  | -5.823400 |
| H  | 9.216800  | 3.551700  | -6.772000 |
| Cl | -7.859700 | -3.952800 | 9.111900  |
| Cl | -6.687000 | -8.043200 | 7.384700  |
| Cl | 2.317600  | -1.204500 | 0.293600  |
| O  | -1.148900 | -1.628500 | 1.548100  |
| O  | -6.335500 | -2.926700 | 6.098700  |
| N  | -3.453600 | -1.805900 | 4.249300  |
| N  | -0.853800 | -0.849800 | 3.711200  |
| H  | -1.330300 | -0.643100 | 4.583000  |
| N  | -4.199900 | -2.380600 | 6.825000  |
| H  | -3.282200 | -2.089300 | 6.501600  |

|   |           |           |          |
|---|-----------|-----------|----------|
| N | 0.605700  | 1.389200  | 2.101100 |
| N | -4.362600 | -5.193700 | 8.215000 |
| C | -3.075600 | -1.530400 | 2.975800 |
| C | -3.985600 | -1.443000 | 1.903500 |
| H | -3.620400 | -1.165100 | 0.920500 |
| C | -5.344600 | -1.689000 | 2.165200 |
| H | -6.077600 | -1.614300 | 1.367600 |
| C | -5.738600 | -2.039500 | 3.468000 |
| H | -6.764700 | -2.276200 | 3.726300 |
| C | -4.762700 | -2.083100 | 4.481800 |
| C | -1.612700 | -1.337200 | 2.694400 |
| C | -5.168200 | -2.496500 | 5.873700 |
| C | 0.592100  | -0.577000 | 3.586500 |
| H | 1.086600  | -0.904200 | 4.508000 |
| H | 0.984400  | -1.170700 | 2.752700 |
| C | 0.902500  | 0.892900  | 3.334400 |
| C | 1.492300  | 1.703300  | 4.322900 |
| H | 1.724800  | 1.283500  | 5.297900 |
| C | 1.789700  | 3.047500  | 4.026600 |
| H | 2.258100  | 3.685000  | 4.771700 |
| C | 1.481900  | 3.555300  | 2.752100 |
| H | 1.724700  | 4.576500  | 2.473100 |
| C | 0.879800  | 2.687900  | 1.821600 |
| H | 0.622200  | 3.022900  | 0.821900 |
| C | -4.416600 | -2.727400 | 8.240700 |

|   |           |           |           |
|---|-----------|-----------|-----------|
| H | -4.015000 | -1.920400 | 8.864800  |
| H | -5.497100 | -2.792800 | 8.416700  |
| C | -3.754900 | -4.043600 | 8.622700  |
| C | -2.557600 | -4.075200 | 9.364100  |
| H | -2.104800 | -3.144700 | 9.695200  |
| C | -1.970100 | -5.315100 | 9.678200  |
| H | -1.050300 | -5.358500 | 10.255600 |
| C | -2.597500 | -6.493700 | 9.240300  |
| H | -2.185800 | -7.472800 | 9.463600  |
| C | -3.797800 | -6.392100 | 8.513500  |
| H | -4.345200 | -7.269200 | 8.177300  |
| O | -2.924700 | -6.277700 | -1.634800 |
| O | -5.369200 | -5.640100 | 5.045800  |
| N | -4.540900 | -6.263200 | 1.596100  |
| N | -4.951200 | -7.156500 | -0.947700 |
| H | -5.600600 | -7.326100 | -0.181100 |
| N | -6.603000 | -6.617600 | 3.331300  |
| H | -6.556100 | -6.868100 | 2.347000  |
| N | -7.276200 | -8.443000 | -0.962800 |
| N | -8.577600 | -5.098600 | 5.543900  |
| C | -3.531900 | -6.101300 | 0.704200  |
| C | -2.285700 | -5.555700 | 1.066400  |
| H | -1.517300 | -5.452400 | 0.309200  |
| C | -2.080300 | -5.168500 | 2.401400  |
| H | -1.127600 | -4.747600 | 2.707400  |



|   |            |            |           |
|---|------------|------------|-----------|
| C | -3.125600  | -5.327400  | 3.327300  |
| H | -3.030100  | -5.046200  | 4.369800  |
| C | -4.342800  | -5.874500  | 2.879600  |
| C | -3.776100  | -6.519000  | -0.725700 |
| C | -5.489300  | -6.038700  | 3.849200  |
| C | -5.344100  | -7.640900  | -2.262500 |
| H | -5.432300  | -6.801800  | -2.969300 |
| H | -4.563800  | -8.299000  | -2.671300 |
| C | -6.667000  | -8.388600  | -2.175000 |
| C | -7.224300  | -8.998500  | -3.318400 |
| H | -6.708900  | -8.936600  | -4.273200 |
| C | -8.443300  | -9.684900  | -3.199400 |
| H | -8.891100  | -10.164800 | -4.065300 |
| C | -9.074200  | -9.746000  | -1.940200 |
| H | -10.014500 | -10.270700 | -1.803500 |
| C | -8.453200  | -9.110400  | -0.852600 |
| H | -8.900400  | -9.135400  | 0.137500  |
| C | -7.794800  | -6.966500  | 4.130500  |
| H | -8.331600  | -7.747700  | 3.581700  |
| H | -7.473400  | -7.389300  | 5.090100  |
| C | -8.731500  | -5.789500  | 4.381600  |
| C | -9.734200  | -5.435100  | 3.455700  |
| H | -9.845600  | -6.005800  | 2.537800  |
| C | -10.584400 | -4.350600  | 3.737800  |
| H | -11.366300 | -4.067400  | 3.037700  |

|    |            |           |           |
|----|------------|-----------|-----------|
| C  | -10.413700 | -3.646500 | 4.943700  |
| H  | -11.051700 | -2.808800 | 5.206700  |
| C  | -9.395200  | -4.050700 | 5.823400  |
| H  | -9.216800  | -3.551700 | 6.772000  |
| Hg | 6.740400   | 5.409700  | -7.258800 |
| Hg | 0.000000   | 0.000000  | 0.000000  |
| Hg | -6.740400  | -5.409700 | 7.258800  |
